# Supplementary material for: Transplantation of Human Embryonic Stem Cell-Derived Retinal Pigment Epithelial Cells in Macular Degeneration
Source: PubMed Central journal article supplement (PMC6195794; doi:10.1016/j.ophtha.2018.04.037), 2018-11
Supplement: mmc1.pdf [file mmc1.pdf]

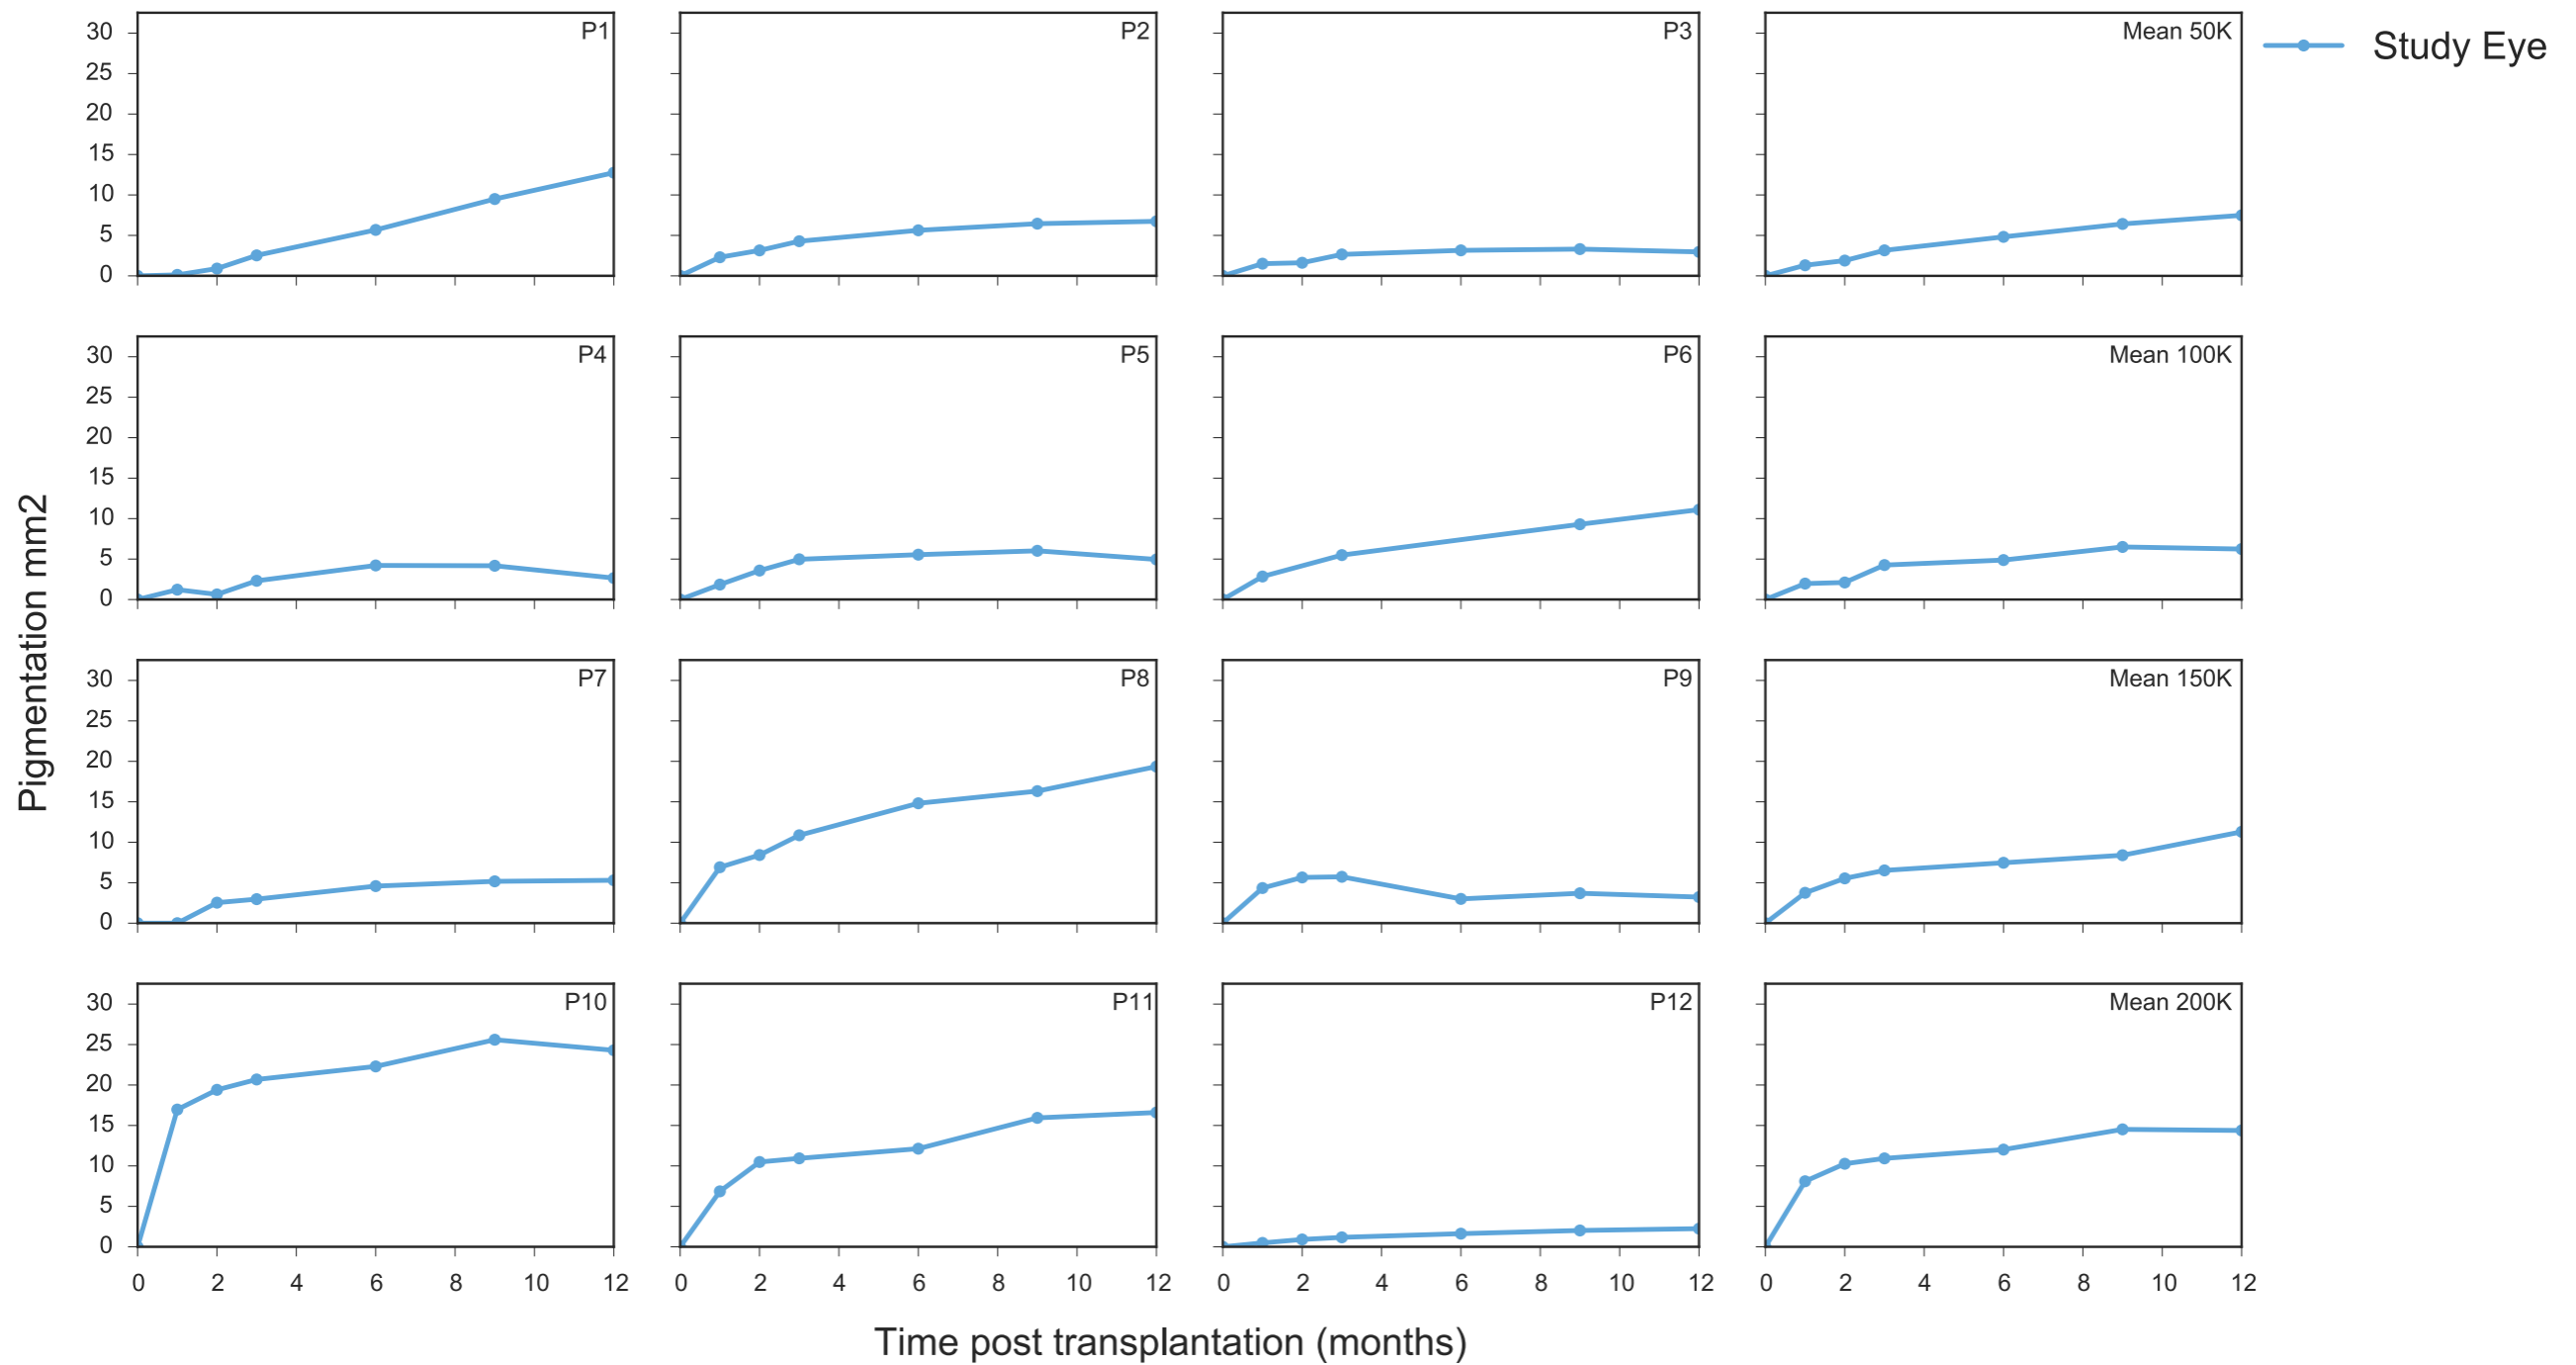

**Supplementary Figure 1: Time-course of pigmentation**

The total area of sub-retinal pigmentation in the study eye of each participant was quantified using ImageJ software.
