# Supplementary material for: Transplantation of Human Embryonic Stem Cell-Derived Retinal Pigment Epithelial Cells in Macular Degeneration
Source: PubMed Central journal article supplement (PMC6195794; doi:10.1016/j.ophtha.2018.04.037), 2018-11
Supplement: mmc2.pdf [file mmc2.pdf]

Mean area of subretinal pigmentation following escalating dose of hESC-derived RPE transplantation

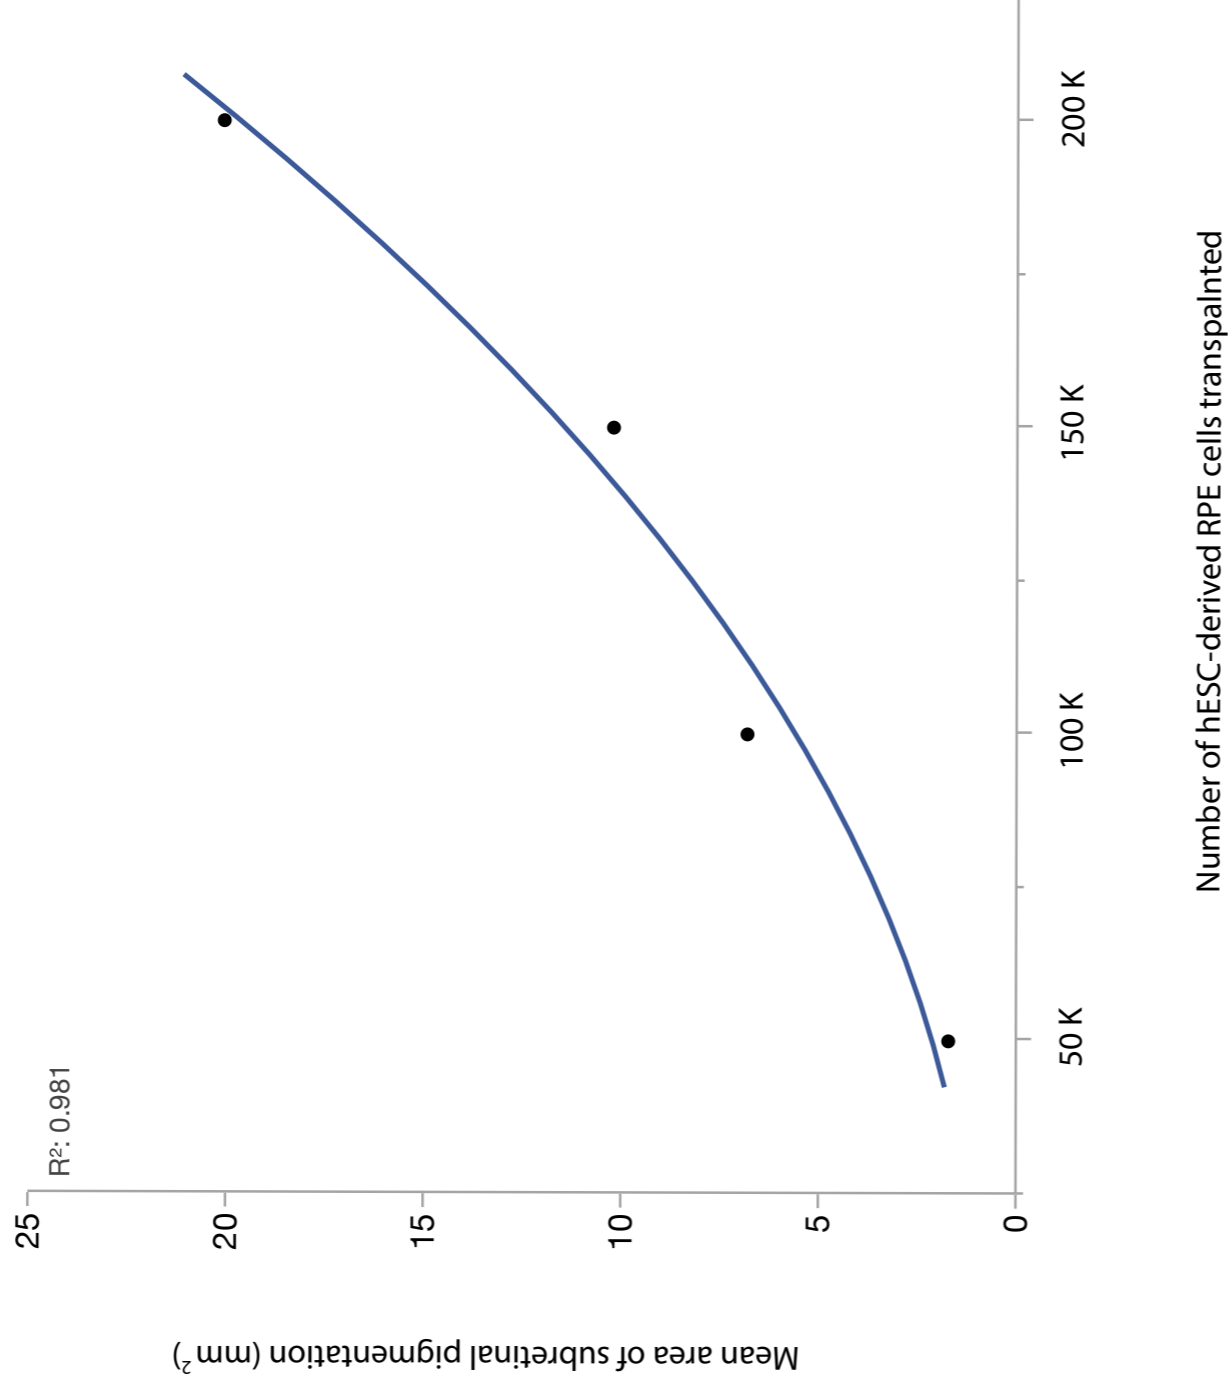

**Supplementary Figure 2: Pigmentation-dose response**

The mean area of subretinal pigmentation correlated directly with the number of hESC-RPE cells transplanted ( $R^2 = 0.981$ )
