# Supplementary material for: Transplantation of Human Embryonic Stem Cell-Derived Retinal Pigment Epithelial Cells in Macular Degeneration
Source: PubMed Central journal article supplement (PMC6195794; doi:10.1016/j.ophtha.2018.04.037), 2018-11
Supplement: mmc4.pdf [file mmc4.pdf]

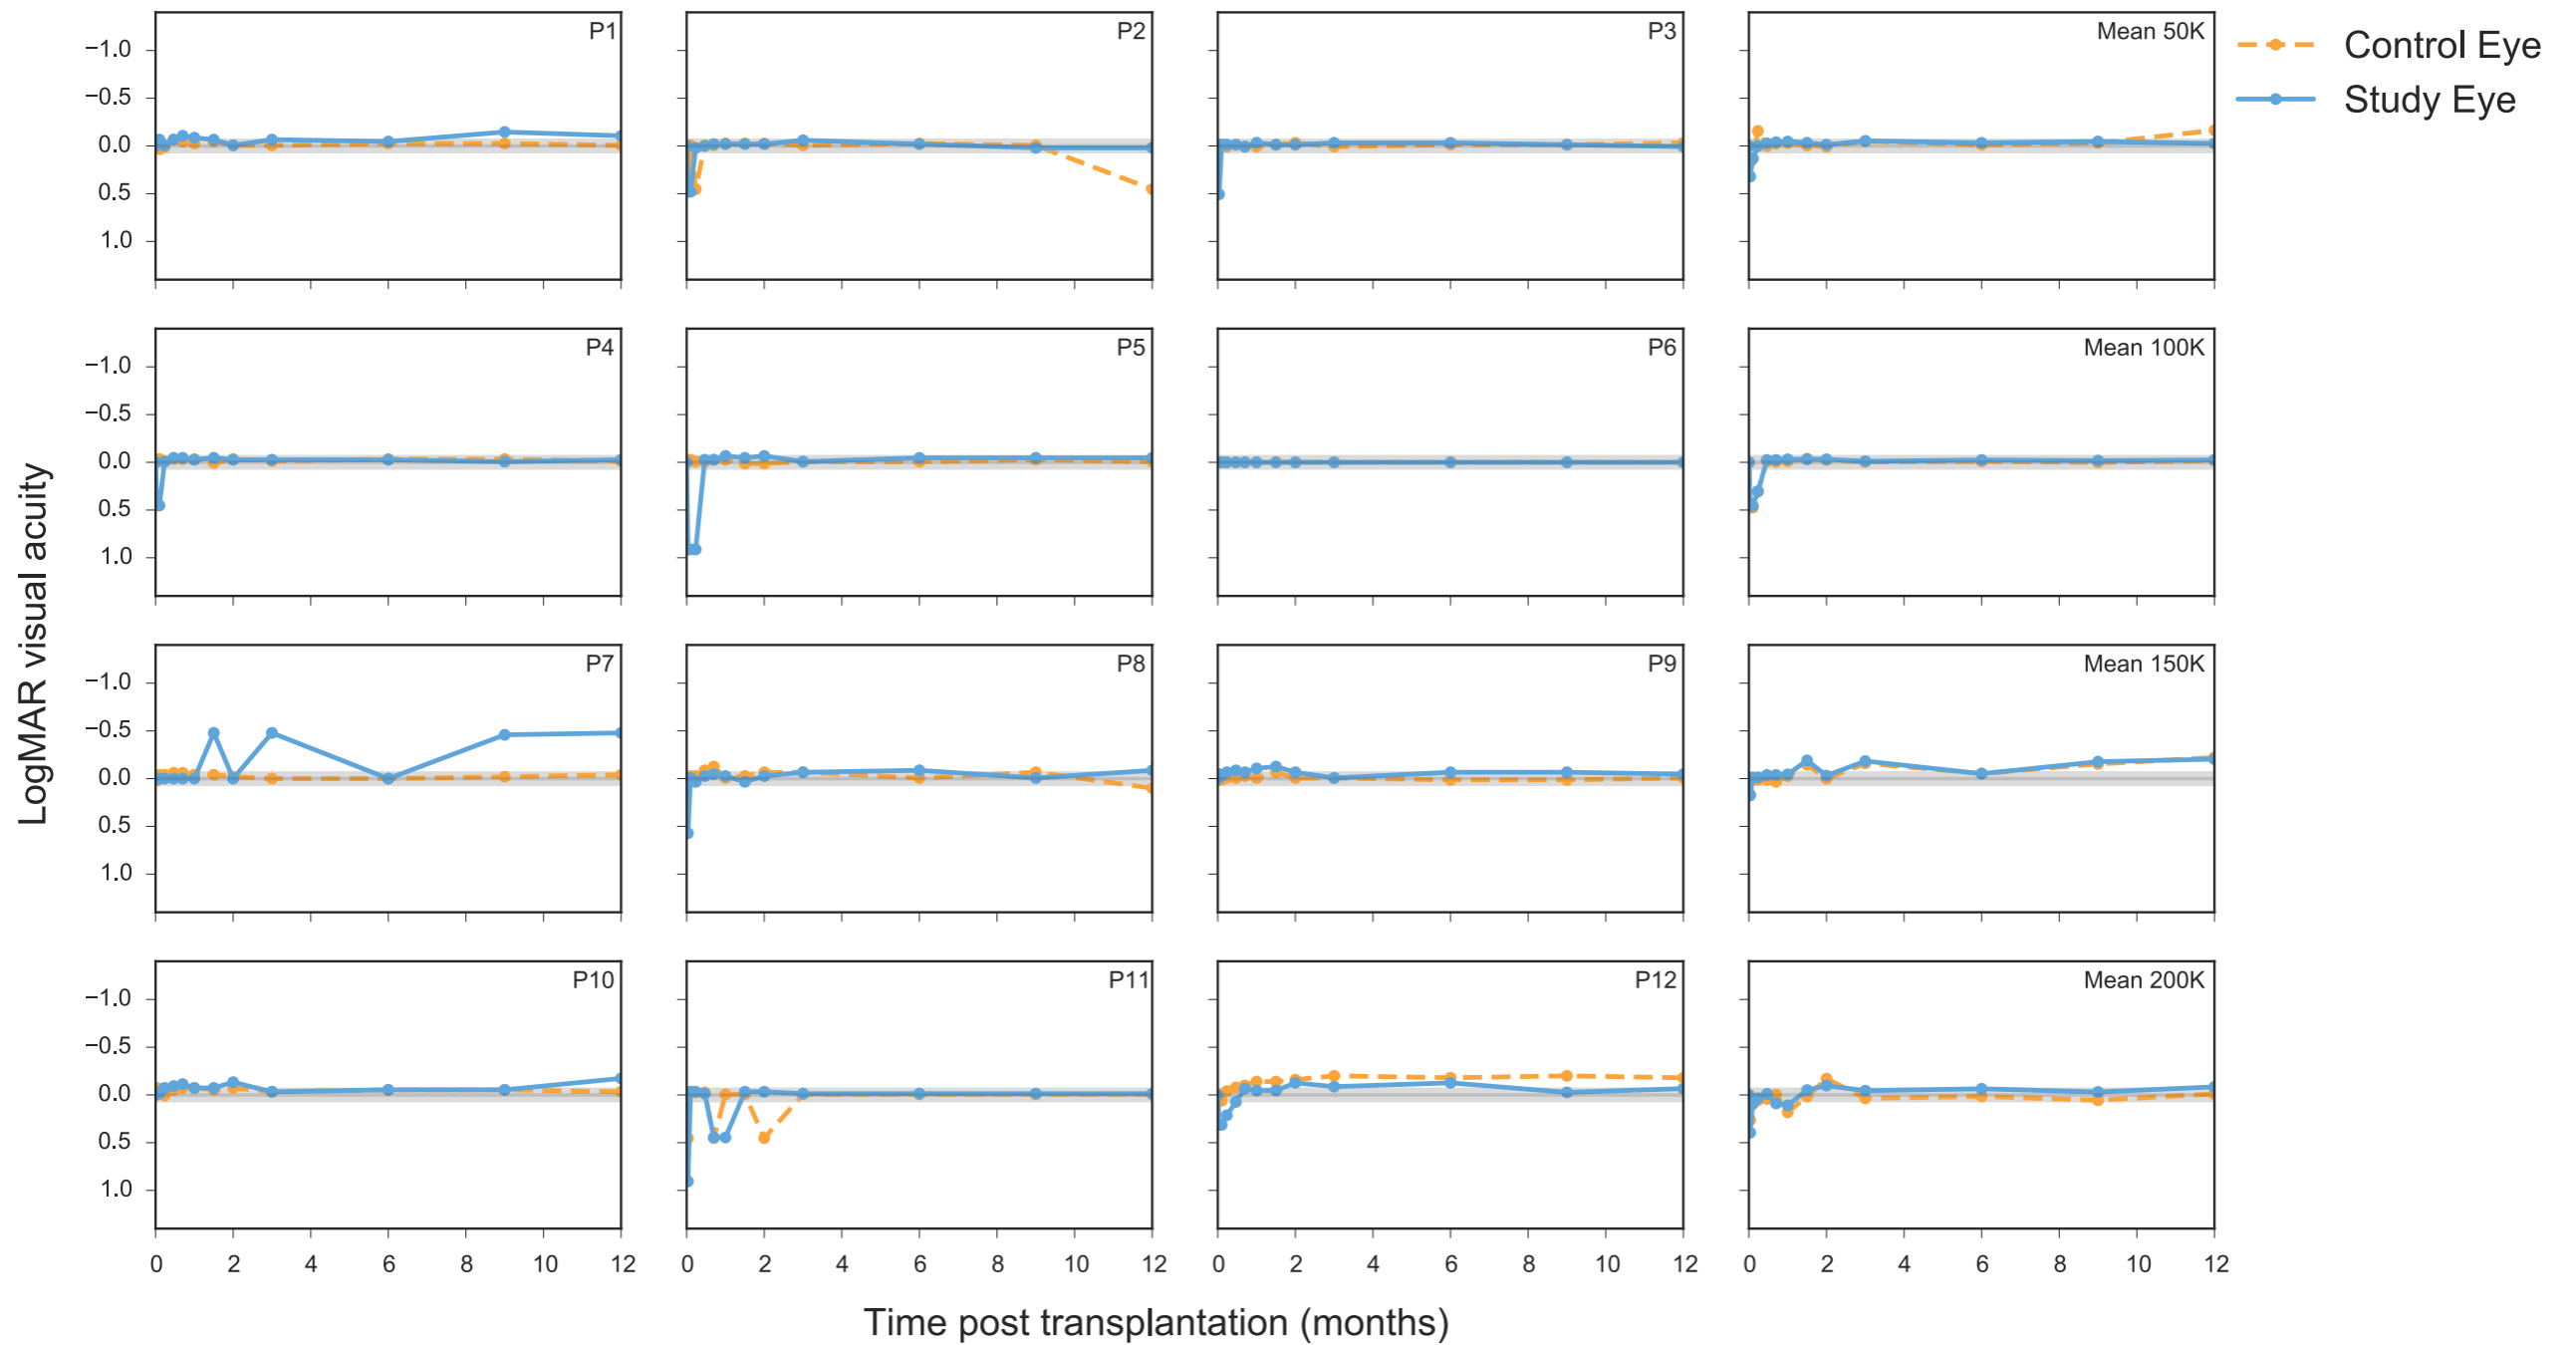

#### Supplementary Figure 4: Visual acuity

For each of the 12 participants, a continuous blue line indicates the visual acuity of the study eye, and a dotted orange line indicates that of the contralateral control eye. Baseline visual acuity is presented as the mean of 3 separate measurements. The grey areas indicate test-retest variability, determined using multiple baseline measurements with the one-way ANOVA method.<sup>1</sup>

#### References

1. Bland JM, Altman DG. Measurement error. *BMJ* 1996;312:1654.
