# Supplementary material for: Transplantation of Human Embryonic Stem Cell-Derived Retinal Pigment Epithelial Cells in Macular Degeneration
Source: PubMed Central journal article supplement (PMC6195794; doi:10.1016/j.ophtha.2018.04.037), 2018-11
Supplement: mmc5.pdf [file mmc5.pdf]

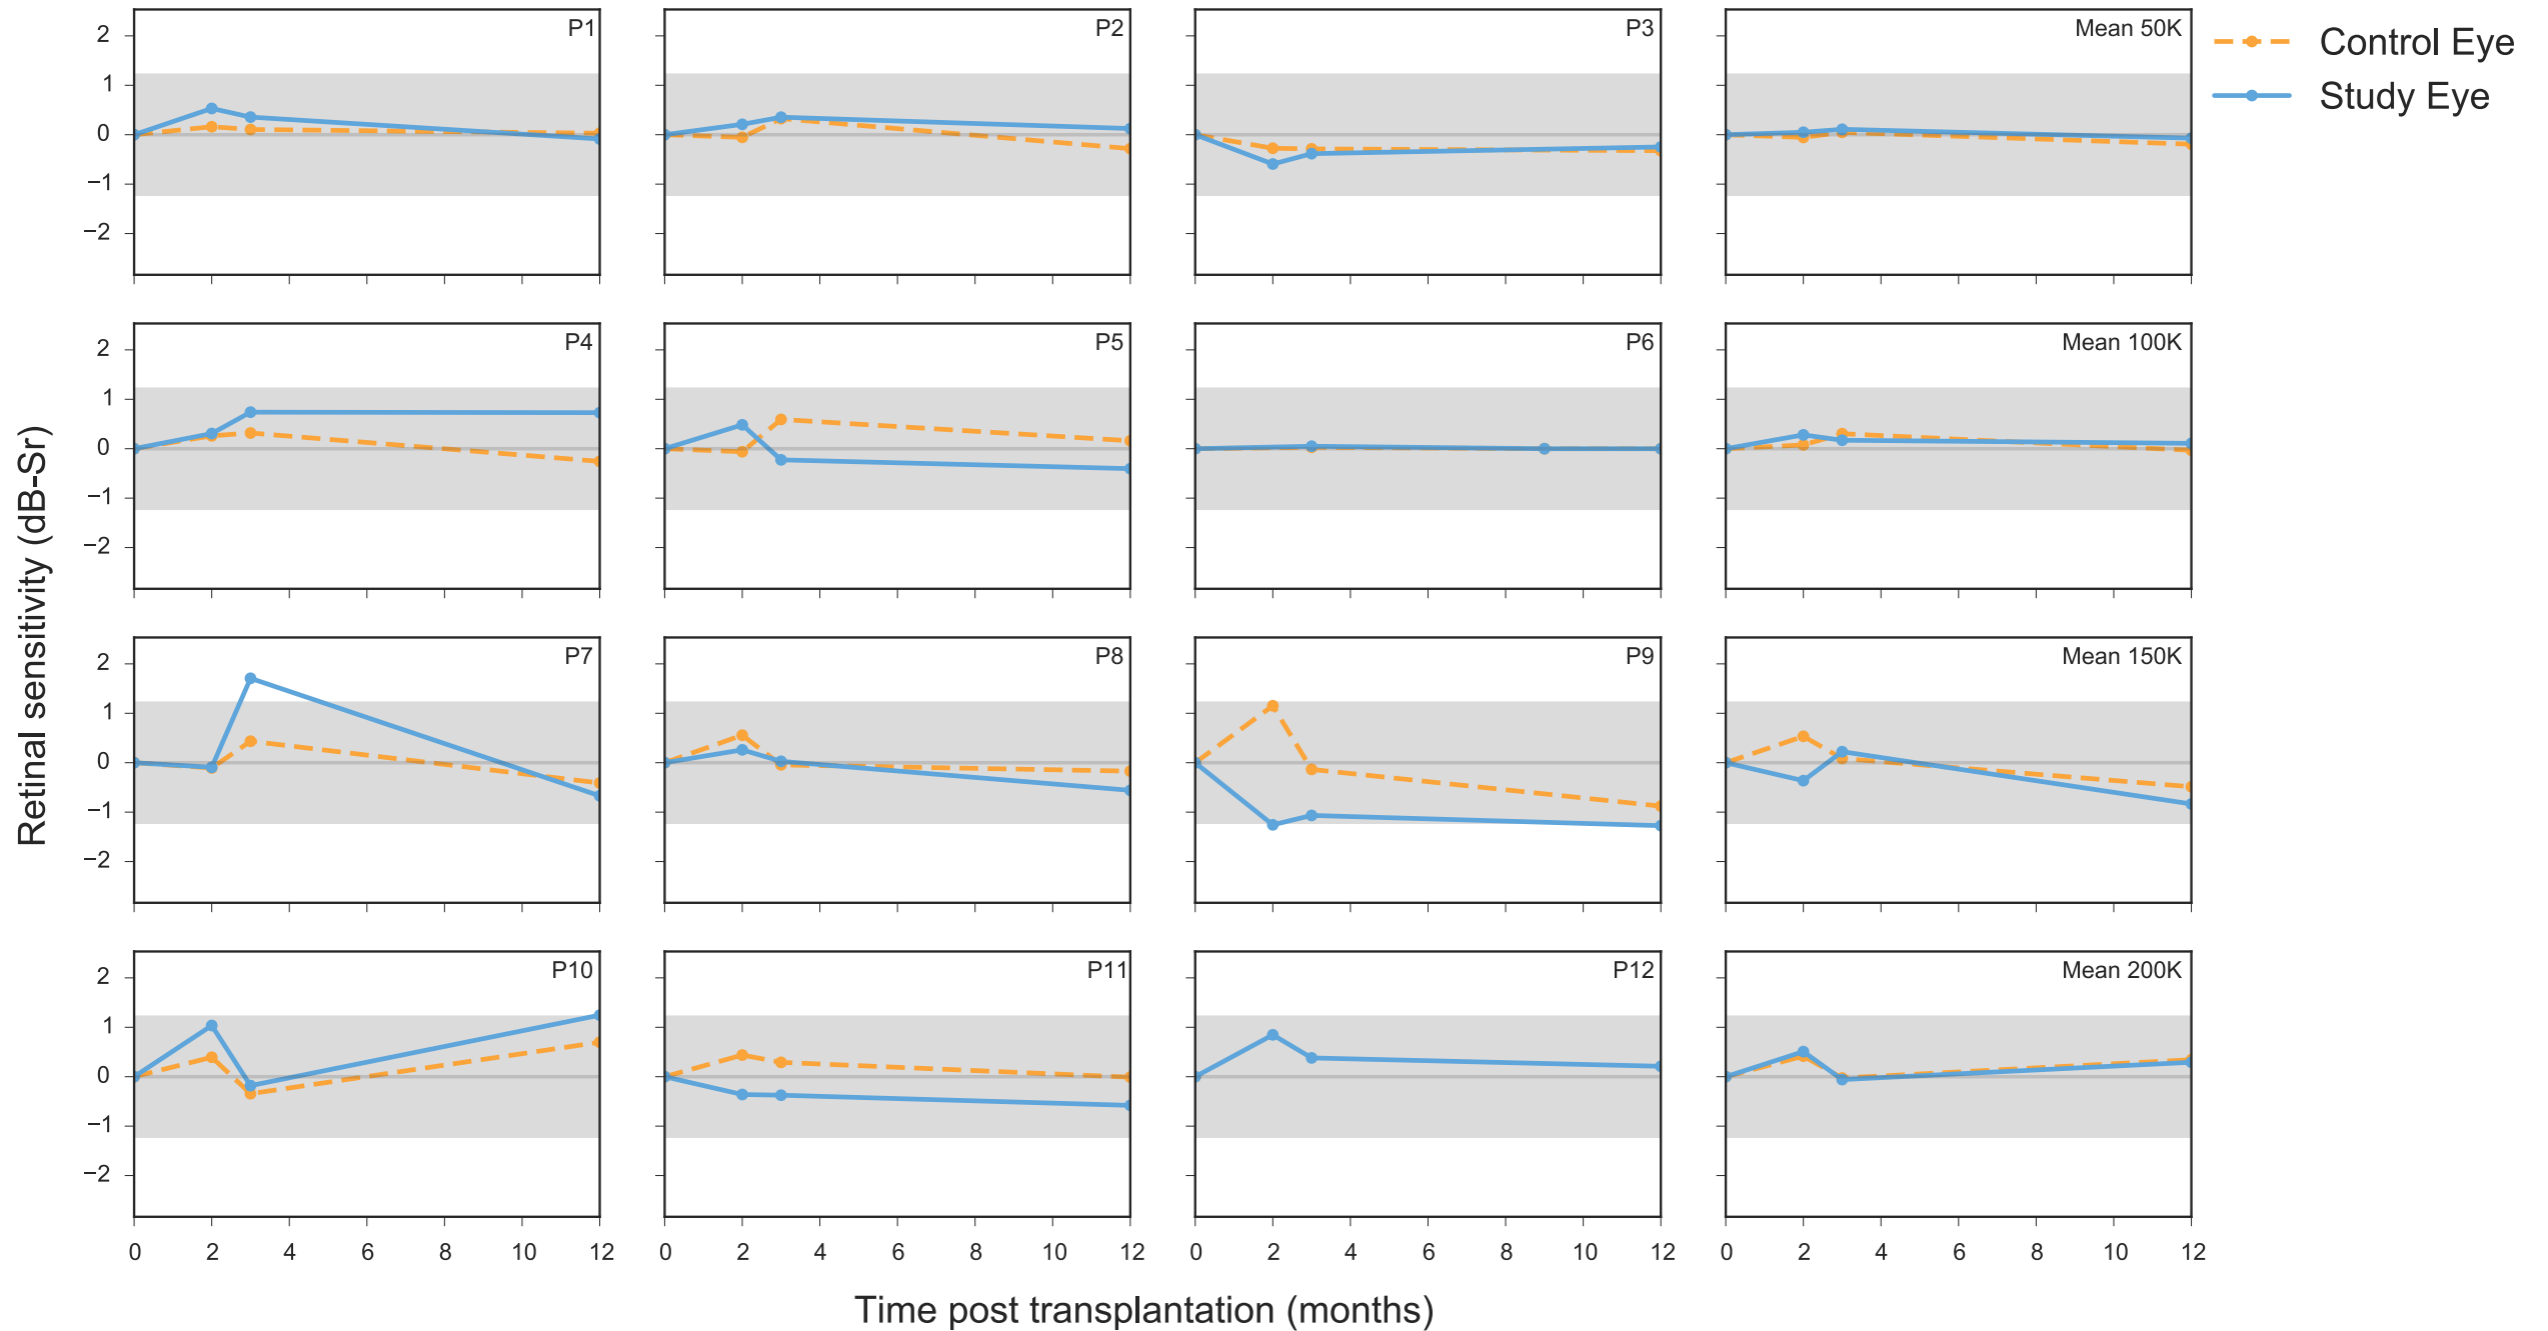

### Supplementary Figure 5: Retinal sensitivity by wide-field microperimetry

Volumetric retinal sensitivity in dB-sr plotted over 12 months for each participant. Sensitivities from each test locus of a central macular grid (Humphrey 10-2 grid) were interpolated to produce a 3-dimensional topographic map and quantified volumetrically using Visual Field Modelling and Analysis (VFMA) software developed by one of the authors.<sup>2</sup> Data from study eyes are plotted with a filled blue symbol connected by a solid line; data from the contralateral control eyes are plotted with a solid orange symbol and connected with a dashed line. The grey areas indicate test-retest variability, determined using the multiple baseline measurements with the one-way ANOVA method.<sup>1</sup>

### References

1. Bland JM, Altman DG. Measurement error. *BMJ* 1996;312:1654.
