# Supplementary material for: Transplantation of Human Embryonic Stem Cell-Derived Retinal Pigment Epithelial Cells in Macular Degeneration
Source: PubMed Central journal article supplement (PMC6195794; doi:10.1016/j.ophtha.2018.04.037), 2018-11
Supplement: mmc6.pdf [file mmc6.pdf]

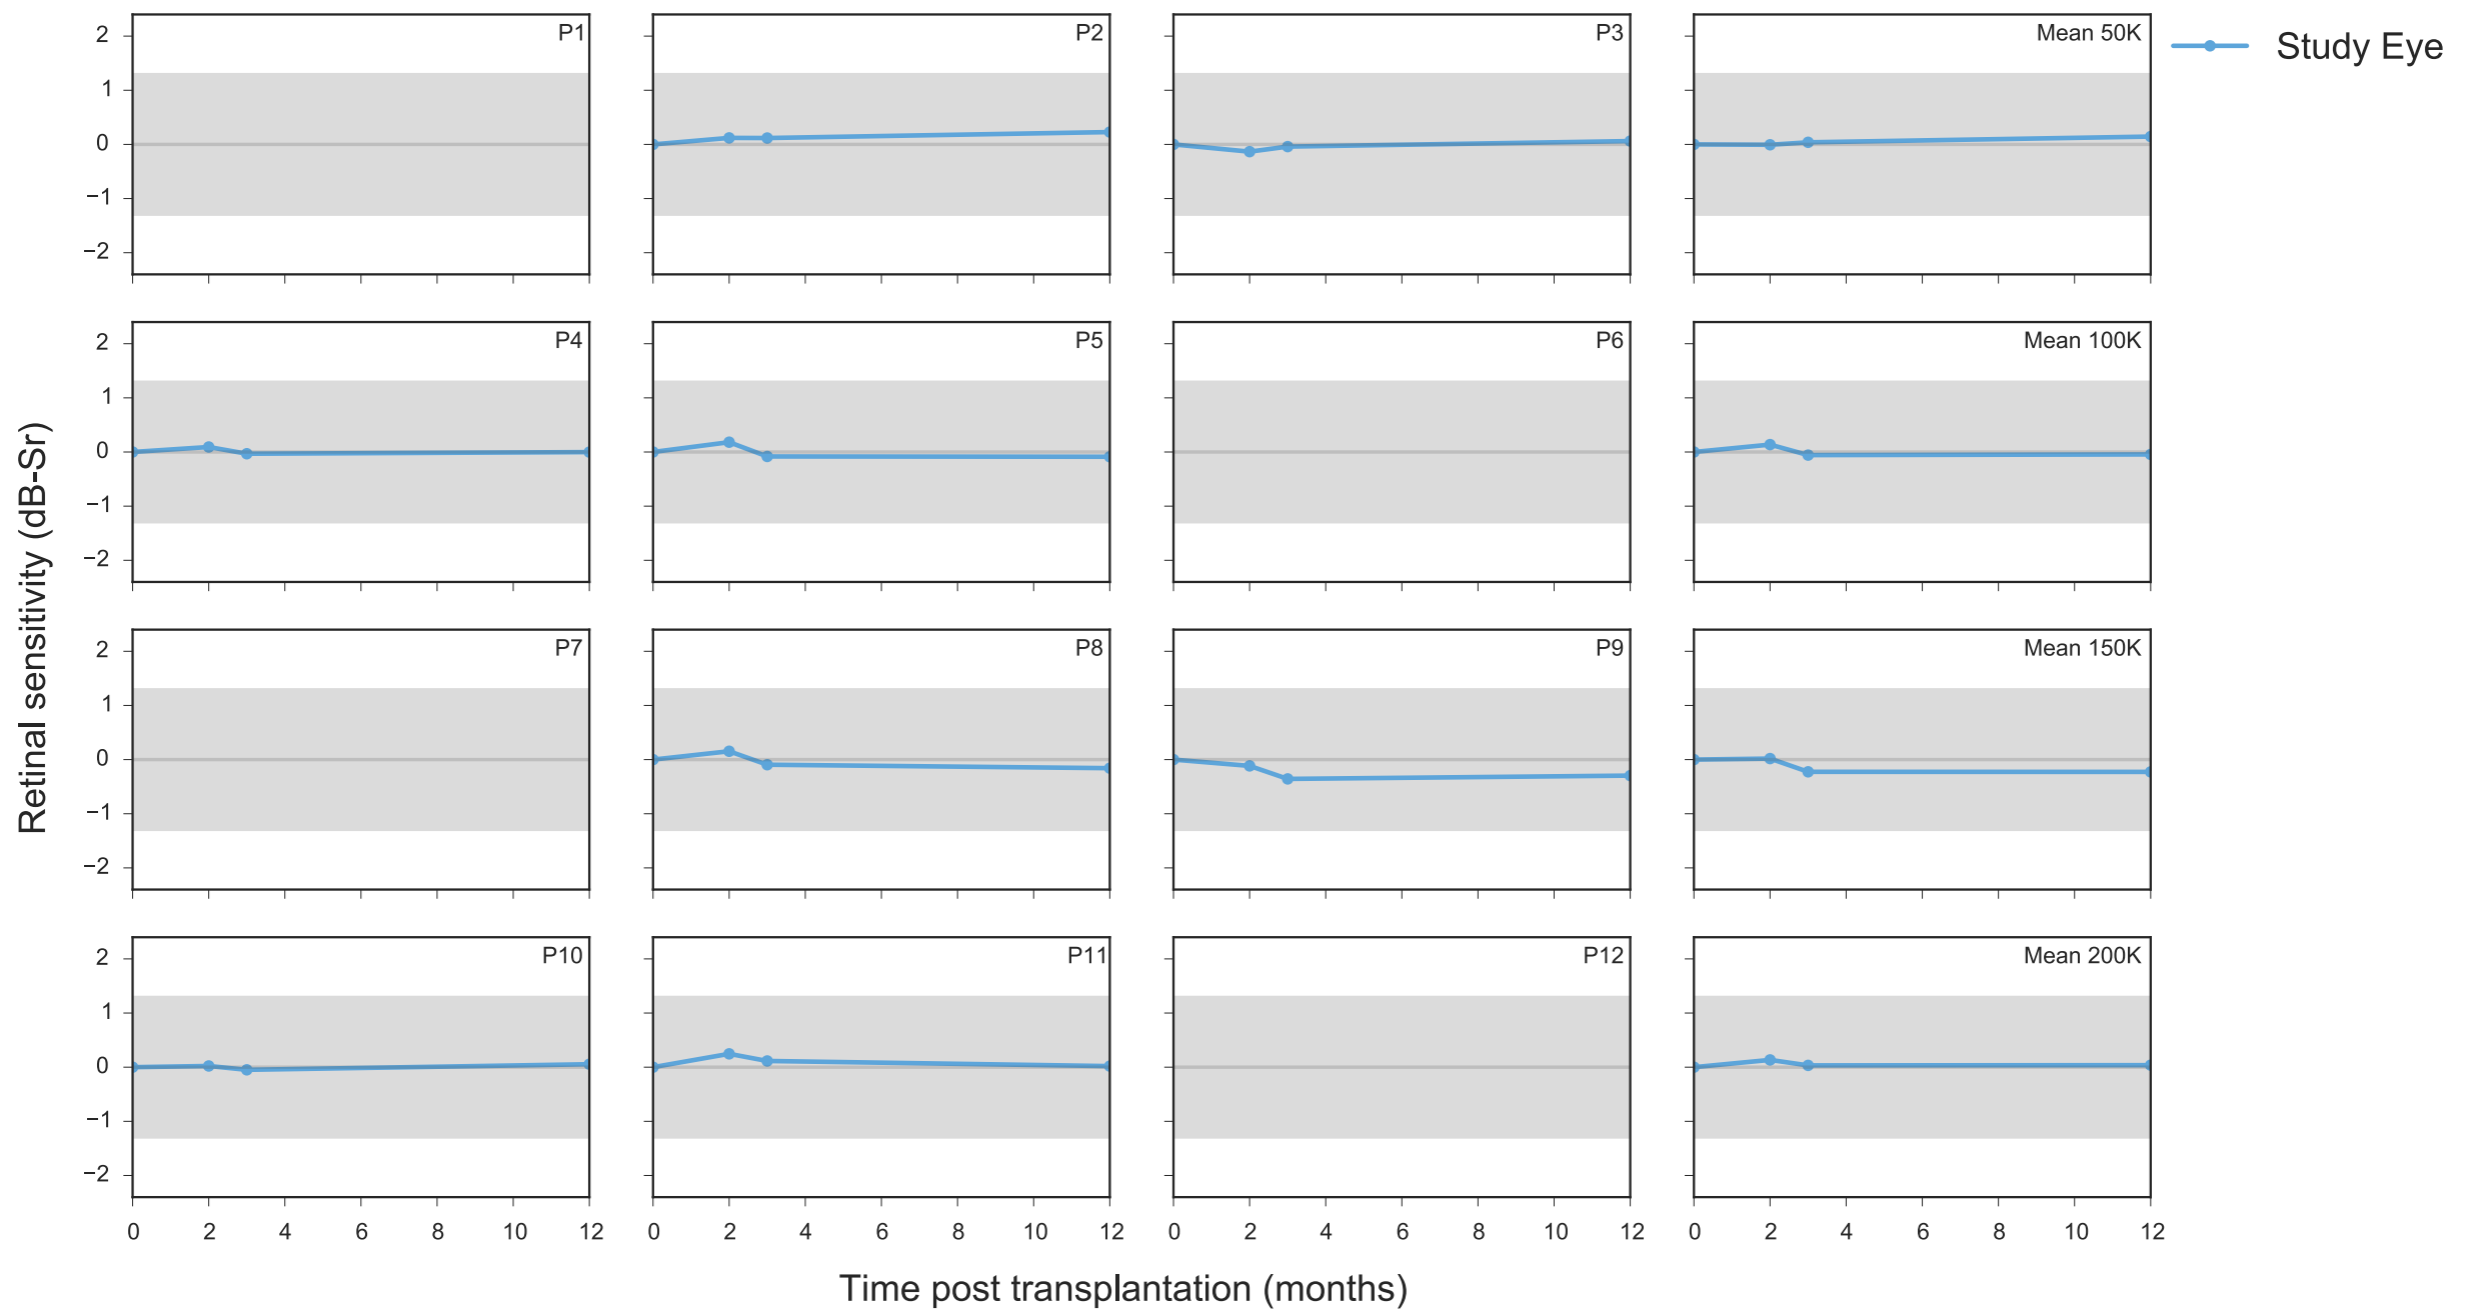

### Supplementary Figure 6: Retinal sensitivity by high-density microperimetry

Volumetric retinal sensitivity in dB-sr plotted over 12 months for each participant. Sensitivities from each test loci at a predefined transition zone in the study eye was measured using high-density microperimetry grid, with each position separated from neighbouring ones by one degree. The sensitivities from all loci were interpolated to produce a 3-dimensional topographic map and quantified using Visual Field Modelling and Analysis (VFMA) software developed by one of the authors.<sup>2</sup> Data from study eyes are plotted with a filled blue symbol connected by a solid line; data from the contralateral control eyes are plotted with a solid orange symbol and connected with a dashed line. The grey areas indicate test-retest variability, determined using the multiple baseline measurements with the one-way ANOVA method.<sup>1</sup> This assessment was unavailable or unreliable in 4 participants (P1, P6, P7 and P12).

### References

1. Bland JM, Altman DG. Measurement error. *BMJ* 1996;312:1654.
2. Weleber RG, Smith TB, Peters D, et al. VFMA: Topographic Analysis of Sensitivity Data From Full-Field Static Perimetry. *Transl Vis Sci Technol* 2015;4:14.
