# Supplementary material for: Transplantation of Human Embryonic Stem Cell-Derived Retinal Pigment Epithelial Cells in Macular Degeneration
Source: PubMed Central journal article supplement (PMC6195794; doi:10.1016/j.ophtha.2018.04.037), 2018-11
Supplement: mmc8.pdf [file mmc8.pdf]

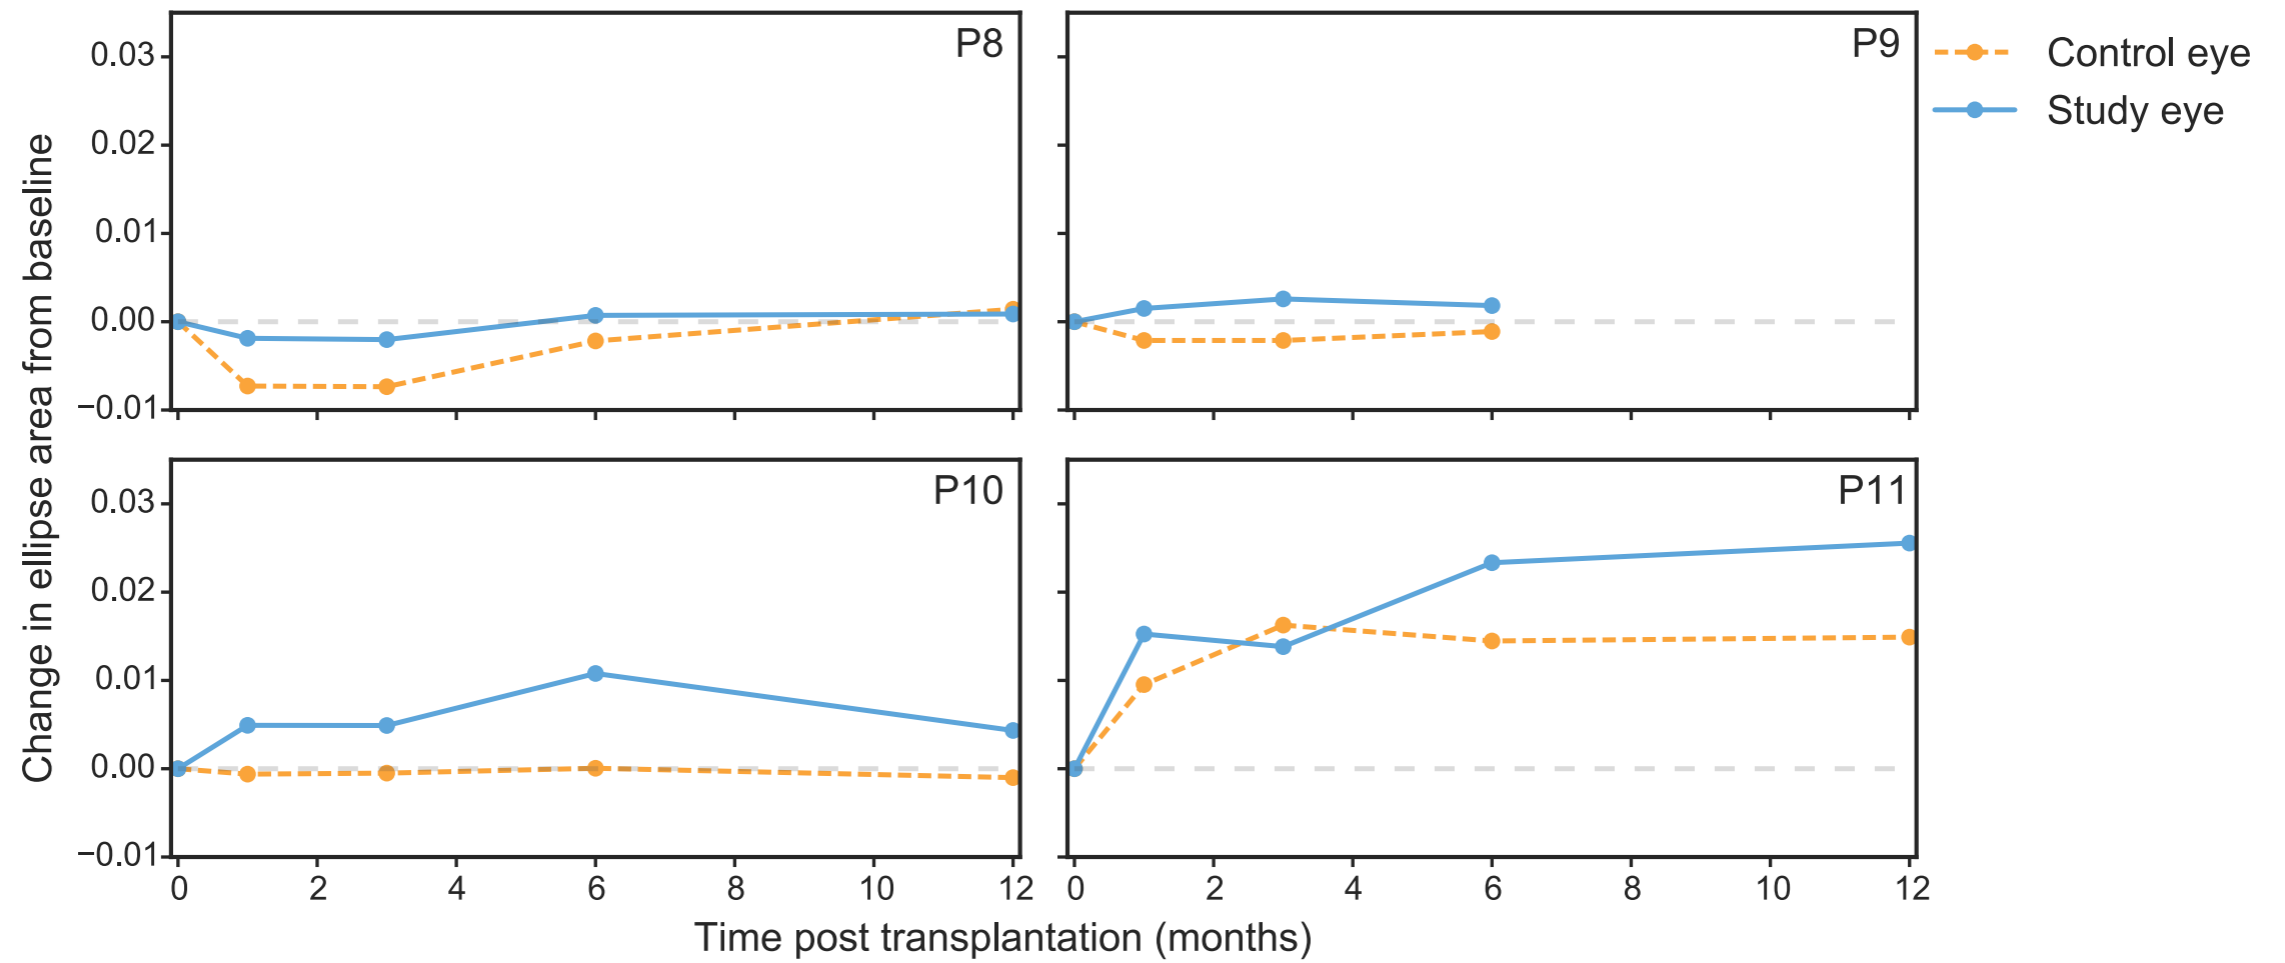

**Supplementary Figure 8: Color discrimination**

Summary graphs of Universal Colour Discrimination Test (UCDT) for participants P8 (A), P9 (B), P10 (C) and P10 (D). The y-axis represents the change in ellipse area from baseline. A positive value in the change of the ellipse area represents a worsening of color discrimination. The time point at which the UCDT was performed is indicated by the x-axis.
